# Supplementary material for: Nested retrotransposition in the East Asian mouse genome causes the classical nonagouti mutation
Source: PubMed Central journal article supplement (PMC6677723; doi:10.1038/s42003-019-0539-7), 2019-08-02
Supplement: 42003_2019_539_MOESM1_ESM.pdf [file 42003_2019_539_MOESM1_ESM.pdf]

|                            |                                                                   |     |
|----------------------------|-------------------------------------------------------------------|-----|
| Unknown                    | TGTCAGAGACCATCCCGTGAGAAAGTGAGCCCTTCACAATCTCCCTAGCAGGCCAAATGG      | 60  |
| <i>Serpina3a</i>           | .....A..A.T.....TT.....A.....                                     | 60  |
| <i>C6</i>                  | .....-.....T.....T..A..A.T...G..                                  | 59  |
| <i>Ednrbs</i> <sup>s</sup> | .....G.....                                                       | 60  |
| Unknown                    | CCTTGTAAGTACTGAGAGCTGGTTGTCACCCCCCTTTCCCTCCCTATTCCTTTTCTGGCACCTGA | 120 |
| <i>Serpina3a</i>           | .....A.....A.....-.....T.....                                     | 119 |
| <i>C6</i>                  | ....A..A.....C.....T.--.....T.....C....AA....A.                   | 117 |
| <i>Ednrbs</i> <sup>s</sup> | .....                                                             | 120 |
| Unknown                    | GGCTGTAAAAGCTGAATTATAGTCCCCTCTTCCCTATCTCTTCCCTGAGTTCCCATGCCAT     | 180 |
| <i>Serpina3a</i>           | .....T.....A...                                                   | 179 |
| <i>C6</i>                  | .A.....TT....A.C.....T.C.....A...                                 | 177 |
| <i>Ednrbs</i> <sup>s</sup> | .....-----.....A...                                               | 165 |
| Unknown                    | CCAAGGACATGAGTTACGCCTGAGCCTAGCCTGACCCCCAAGGCTGTCAAGGAGGATCGA      | 240 |
| <i>Serpina3a</i>           | .....C.G.....C.....T.....                                         | 239 |
| <i>C6</i>                  | .....C.GT.....C...T...T.....TG.....A.                             | 237 |
| <i>Ednrbs</i> <sup>s</sup> | .....C.....                                                       | 225 |
| Unknown                    | TGTTCCAGAGATAAGATCCAGAGTGCCCGCTGCCTGGCGCCTGACTTCGGCCCCCATGTC      | 300 |
| <i>Serpina3a</i>           | .....G.....                                                       | 299 |
| <i>C6</i>                  | G.C..TG.....G..A.....T...T.....A.....                             | 297 |
| <i>Ednrbs</i> <sup>s</sup> | .....A.....                                                       | 285 |
| Unknown                    | AGCAGATGCCCACTTCTTTGTTCTTTGTATAATTCCTCCCTCGACCCCTCCCATATTCCCC     | 360 |
| <i>Serpina3a</i>           | .....                                                             | 359 |
| <i>C6</i>                  | ....TC.T..TT.C.C.....C..C.....C...TT..                            | 357 |
| <i>Ednrbs</i> <sup>s</sup> | .....A.....                                                       | 345 |
|                            | TATA box                                                          |     |
| Unknown                    | GCGATGTATGCTTTAAAAAGAAGGCACCTCAGCCTAATAAACCAGACCTTGATAGGTTCA      | 420 |
| <i>Serpina3a</i>           | .....T.....G.....C...A...--.                                      | 417 |
| <i>C6</i>                  | .....T..G..A.....T.....T.....                                     | 417 |
| <i>Ednrbs</i> <sup>s</sup> | .....                                                             | 405 |
|                            | poly(A) signal                                                    |     |
| Unknown                    | ATCTACTTGGTCTCCGACTCTTCTTTCTTTTACTCCCATTTCCTTCCAGGTTTGCGGTC       | 480 |
| <i>Serpina3a</i>           | CC..T.C.....-...T.T.TC.....C.....                                 | 476 |
| <i>C6</i>                  | .....G..-C.....C.....C.....                                       | 476 |
| <i>Ednrbs</i> <sup>s</sup> | .....                                                             | 465 |
|                            | R   U5                                                            |     |
| Unknown                    | CCCCTCGCACCCACGAATAACTGAGTCCCGCGGGACGGGATA                        | 522 |
| <i>Serpina3a</i>           | .....G.....A..T.....                                              | 518 |
| <i>C6</i>                  | .....A.....                                                       | 518 |
| <i>Ednrbs</i> <sup>s</sup> | .....A.....                                                       | 507 |

**Supplementary Figure 1 | Comparison between the sequence of the direct terminal repeat of the unknown element in the *a* allele and homologous sequences in the *Serpina3a* and *C6* mRNAs and the inserted sequence in the *s* allele.** The positions of the candidate TATA box and poly (A) signal are indicated by open boxes with the corresponding names. The U3, R, and U5 regions are shown shaded in gray, and the borders are indicated by lines. The position of each sequence is shown on the right.

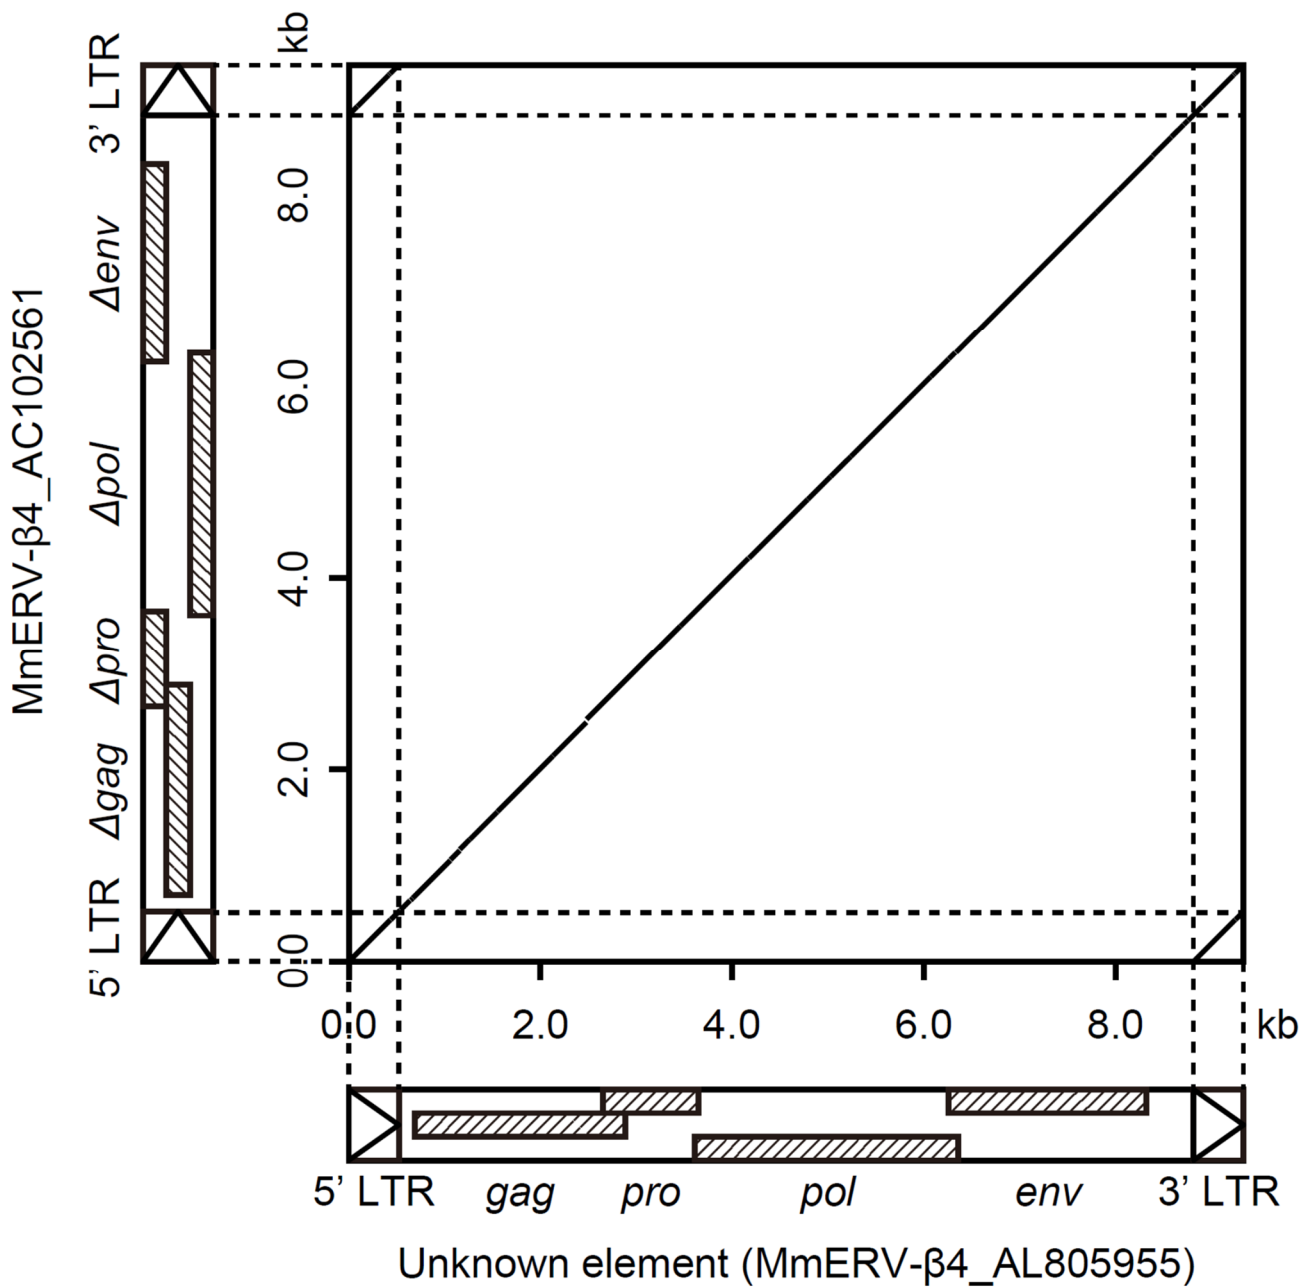

**Supplementary Figure 2 | Dot plot of the unknown sequence in the *a* allele against the reference β4 sequence.** Comparison of the unknown sequence in the *a* allele (horizontal axis) and the reference β4 (MmERV-β4\_AC102561) sequence (vertical axis). The description is according to Fig. 2. LTR, long terminal repeat. kb, kilobases.

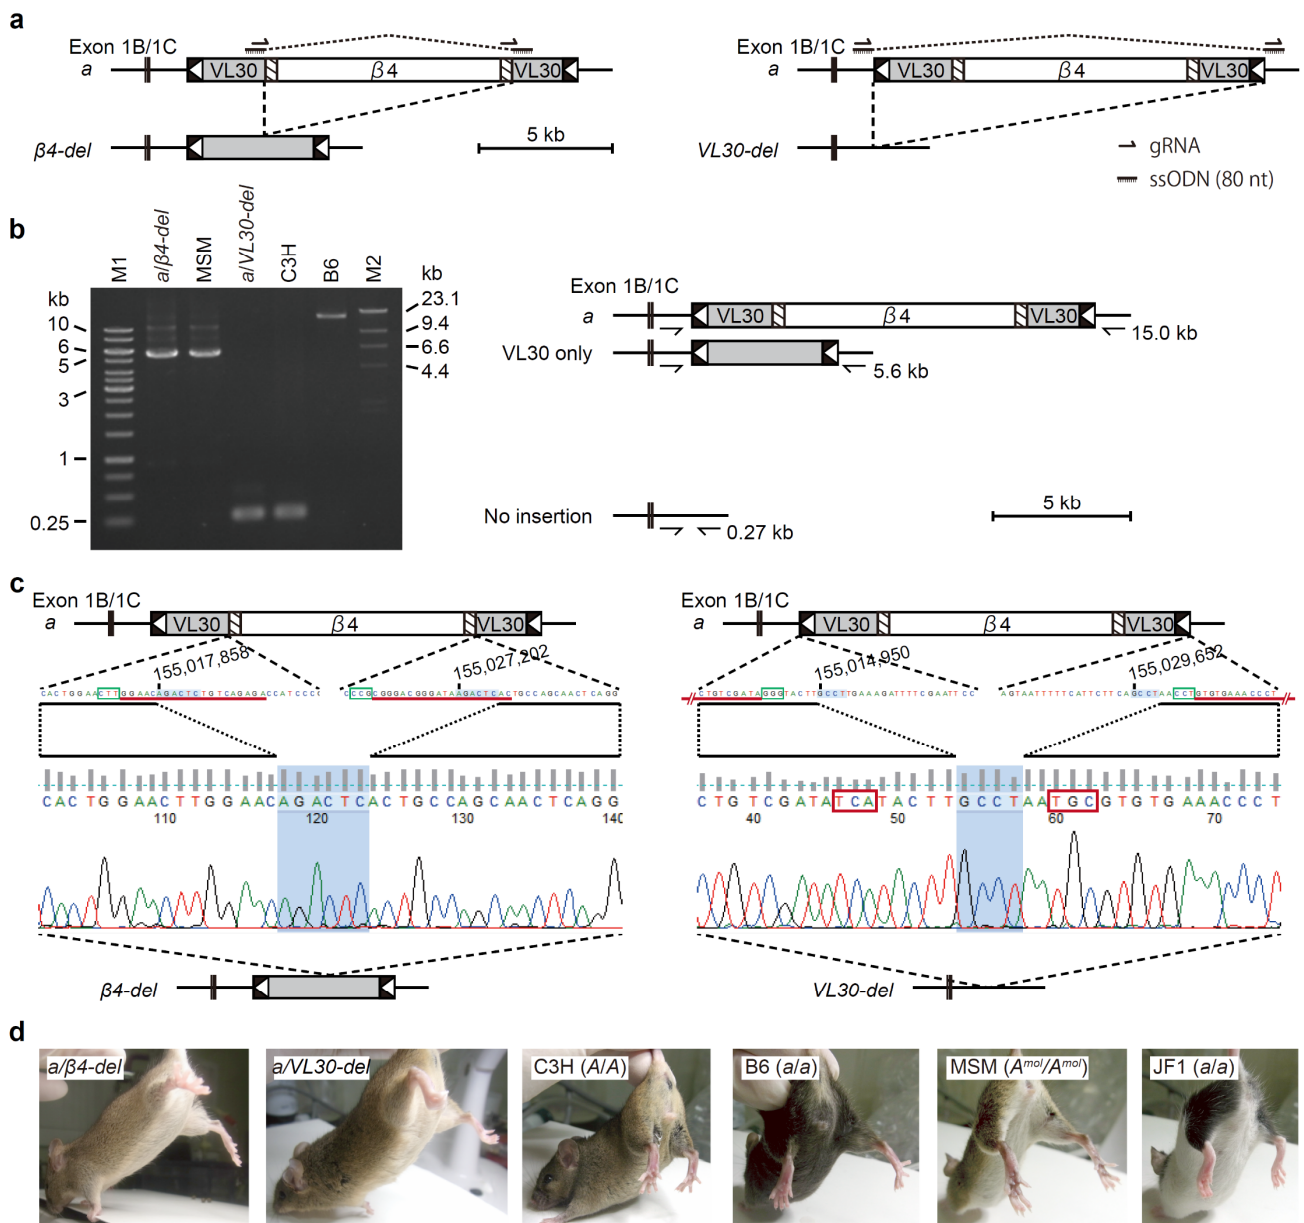

**Supplementary Figure 3 | Generation of  $\beta 4$ -del and VL30-del mice.** **a**, Targeting scheme to delete the  $\beta 4$  (left) and the VL30 (right) insertions in the *a* allele. Scale bar = 5 kb. **b**, Gel-electrophoresis of the PCR-amplified genomic DNA fragments spanning the targeted site. A schematic illustration of the structure of each amplified DNA fragment is shown on the right. Primers used for genomic PCR are marked by arrows. Scale bar = 5 kb. **c**, Representative electropherograms from Sanger sequencing of the region spanning the targeted  $\beta 4$  (left) and VL30 (right) insertions. The directly duplicated sequence on both sides of the deleted endogenous retroviral sequence is highlighted by a blue background. The protospacer adjacent motif (PAM) (green box) and the gRNA sequences (red lines) are shown above the electropherogram. In the targeting of the VL30 insertion, the PAM sequence was modified from the original genomic sequence to an unrelated sequence (red boxed) to avoid re-cutting by the Cas9 nuclease of the target gRNA. **d**, Ventral views of adult  $\beta 4$ -del (*a/\beta 4*-del) and VL30-del (*a/VL30*-del) heterozygous mutant mice and that of B6 (*a/a*), MSM (*A<sup>mol</sup>/A<sup>mol</sup>*), and JF1 (*a/a*) mice. Both targeted deletions resulted in a cream-colored ventrum, whereas the MSM mouse has a much paler ventrum. kb, kilobases.

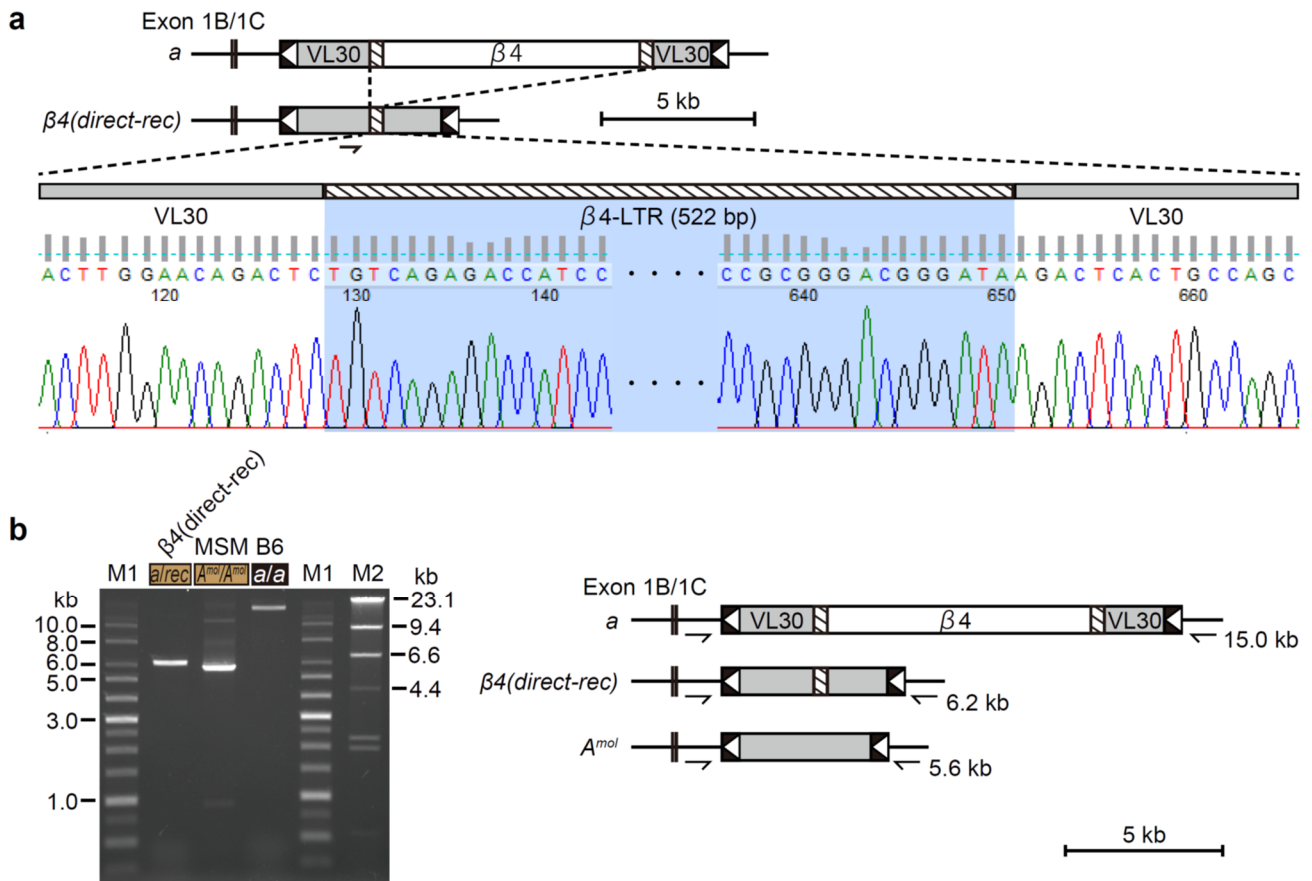

**Supplementary Figure 4 | Generation of  $\beta 4(\text{direct-rec})$  mice. a, Top;** Schematic illustration of the structure of the  $a^l$  allele. Primer used for Sanger sequencing is shown with an arrow. Scale bar = 5 kb. **Bottom;** Representative electropherogram from Sanger sequencing of the solo  $\beta 4$  LTR insertion in the VL30 sequence in the  $a^l$  allele. The  $\beta 4$  LTR sequence is highlighted with a blue background. The central region of the  $\beta 4$  LTR is omitted. **b, Gel electrophoresis of the PCR-amplified genomic DNA fragments spanning the insertions in the *agouti* locus.** The  $\beta 4(\text{direct-rec})$  allele shows a longer PCR product than the MSM allele, which contains a solo VL30 insertion. Schematic illustrations of the structures of each amplified DNA fragment are shown on the right. Primers used for genomic PCR are shown with arrows. Scale bar = 5 kb.

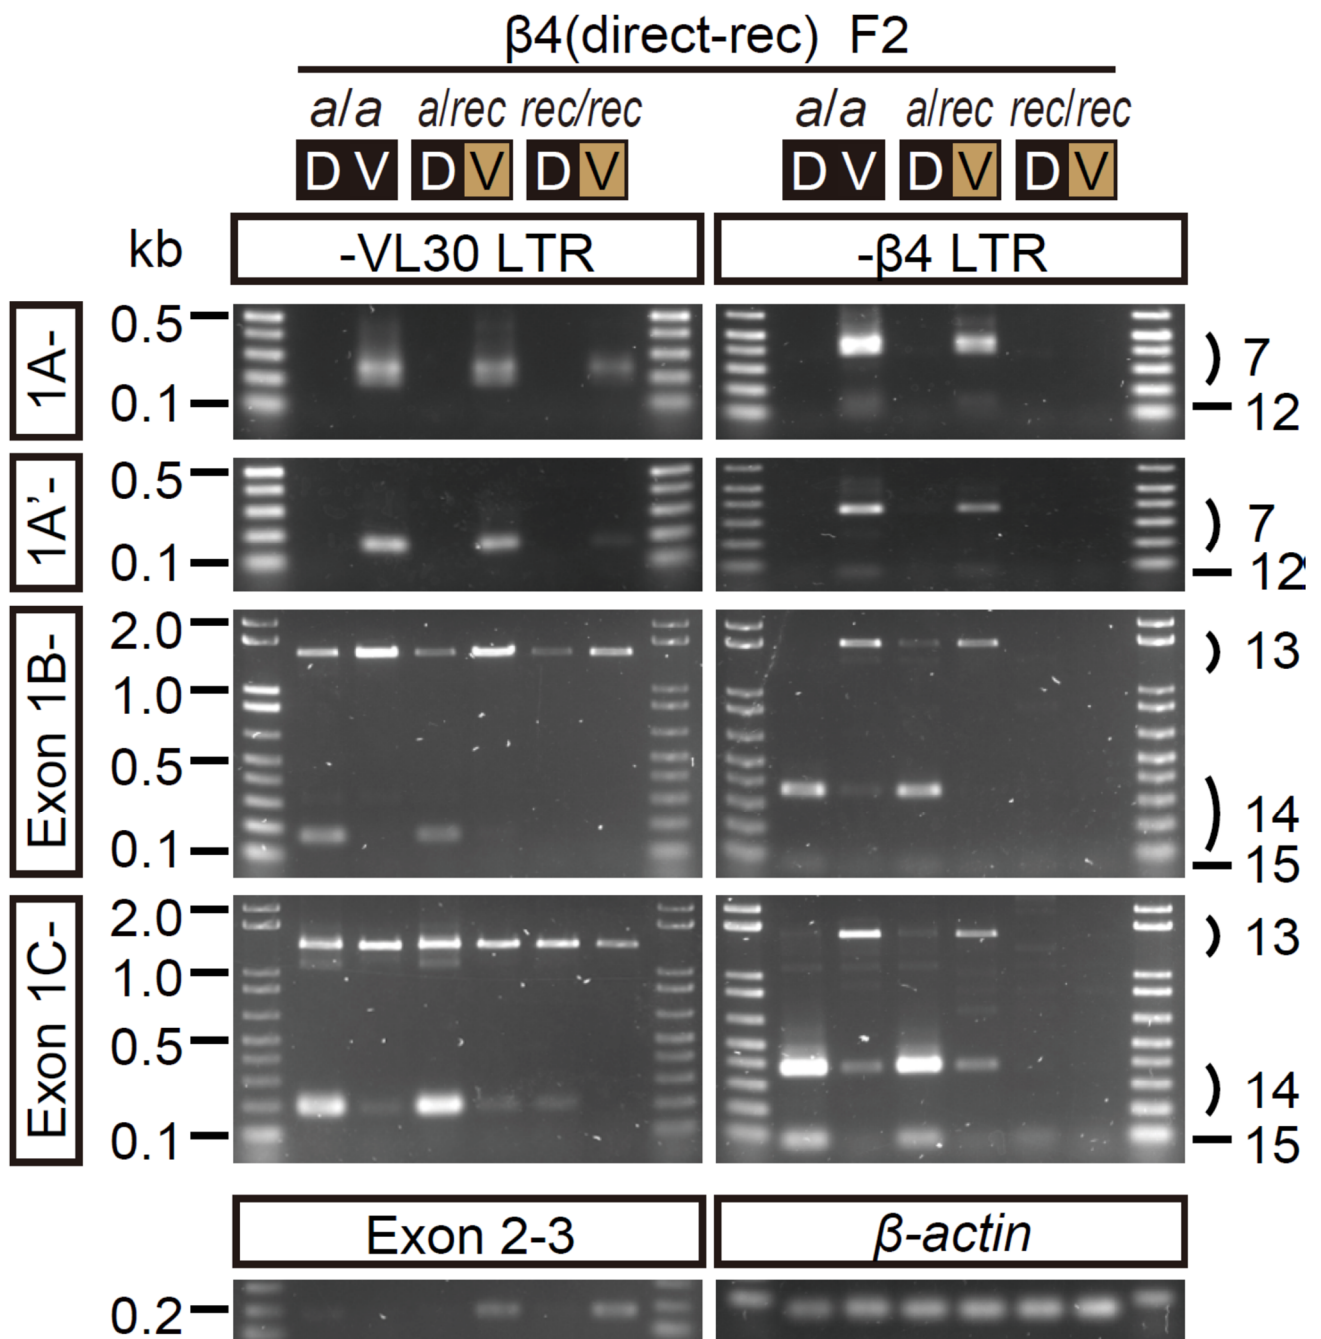

**Supplementary Figure 5 | RT-PCR of the *agouti* transcripts in the dorsal and ventral skins of neonatal  $\beta 4$ (direct-rec) mice.** F2 littermates [*a/a*, *a $\beta 4$ (direct-rec)* and  *$\beta 4$ (direct-rec)/ $\beta 4$ (direct-rec)*] were used for the analyses. The *agouti* transcripts were amplified from exons 1A, 1A', 1B, and 1C to the VL30 LTR or the  $\beta 4$  LTR. Transcript numbers according to those in Fig. 4. are shown on the right. The *agouti* transcripts from exon 2 to 3 were also amplified.  $\beta$ -actin was used as an internal control. D, dorsal skin; V, ventral skin.

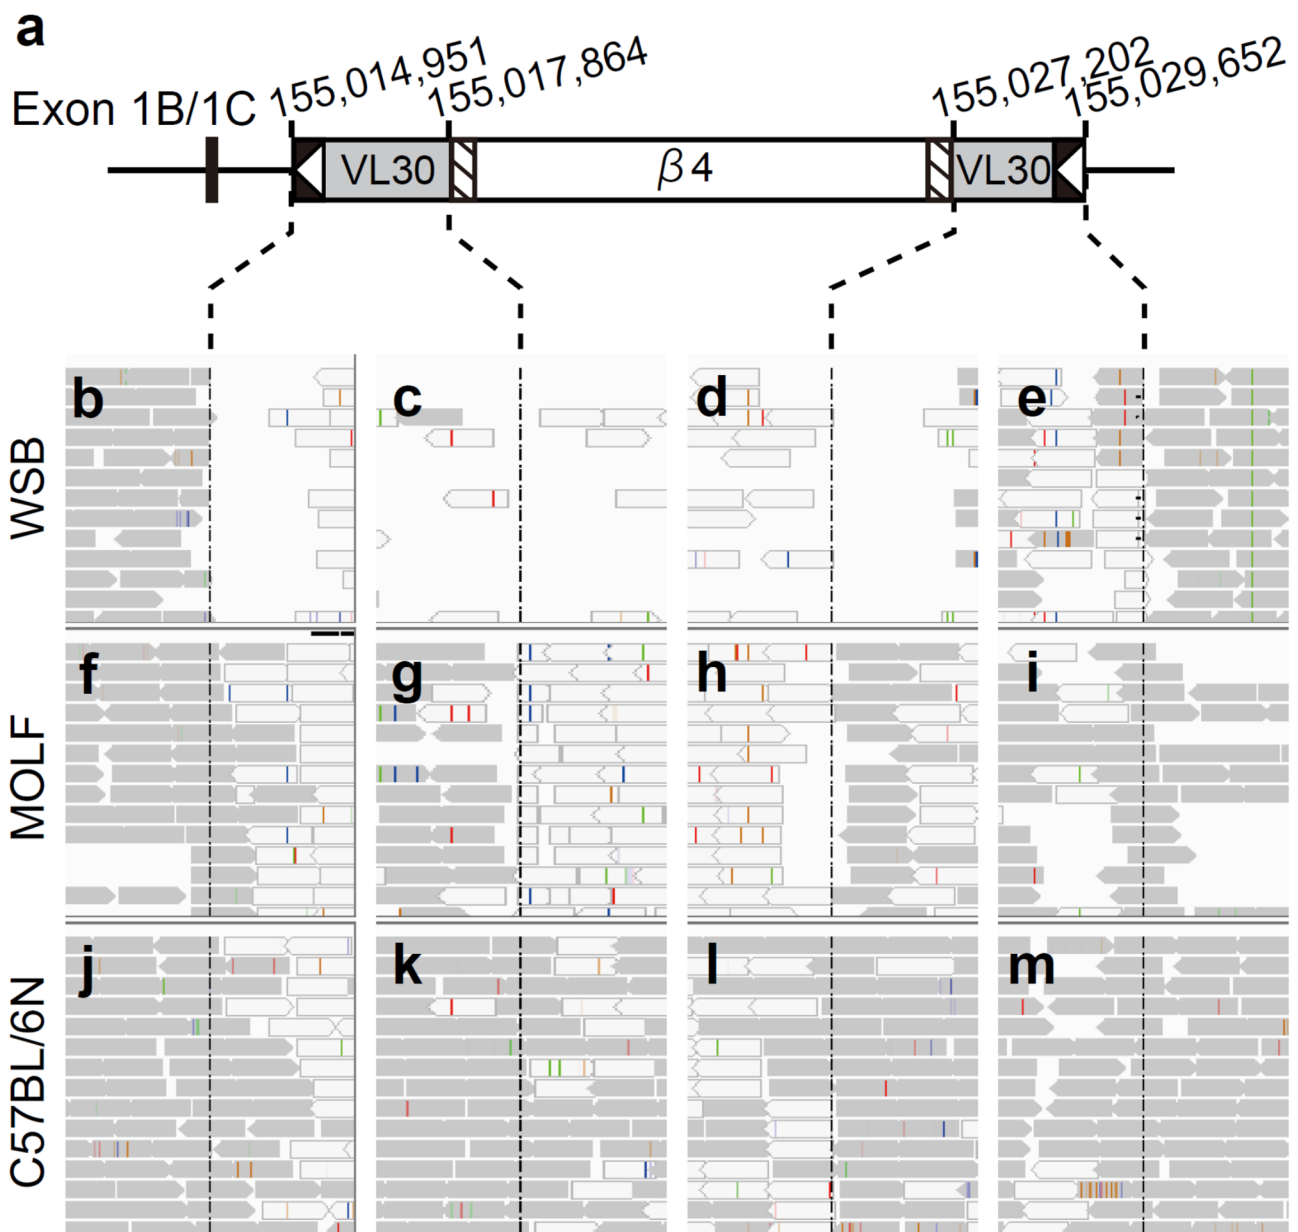

**Supplementary Figure 6 | Representative mapping of NGS reads to sites of the  $\beta 4$  and the VL30 insertions in the *a* allele. a**, Schematic representation of structure of the VL30 and the  $\beta 4$  elements in the *a* allele. **b–m**, Mapping of the NGS data<sup>1</sup> from WSB (**b–e**), MOLF (**f–i**), and C57BL/6N (**j–m**) strains spanning the sites of the VL30 (left sides: **b**, **f**, **j**; right sides: **e**, **i**, **m**) and  $\beta 4$  insertions (left sides: **c**, **g**, **k**; right sides: **d**, **h**, **l**) in the *a* allele. kb, kilobases.

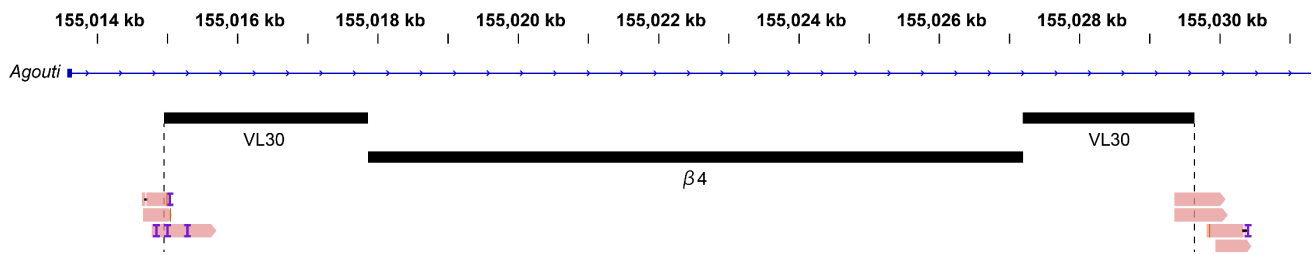

**Supplementary Figure 7 | Mapping of capillary sequencing data around the insertion of VL30 in the *agouti* locus in the MSM strain.** Capillary sequencing data<sup>2</sup> derived from MSM genomic DNA was mapped onto the B6 genome. Mapped sequences are indicated as pink bars. The regions of the VL30 and  $\beta 4$  elements are indicated by black bars.

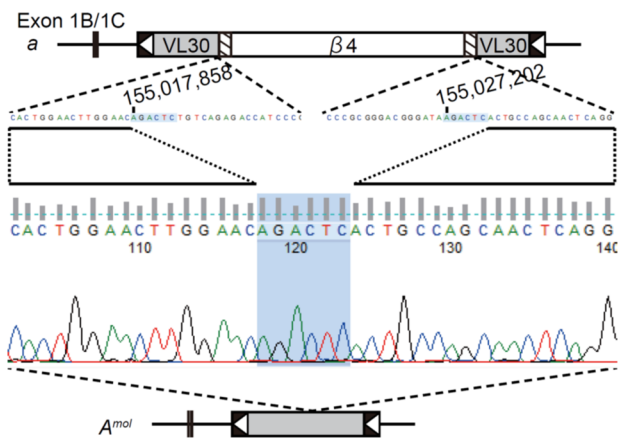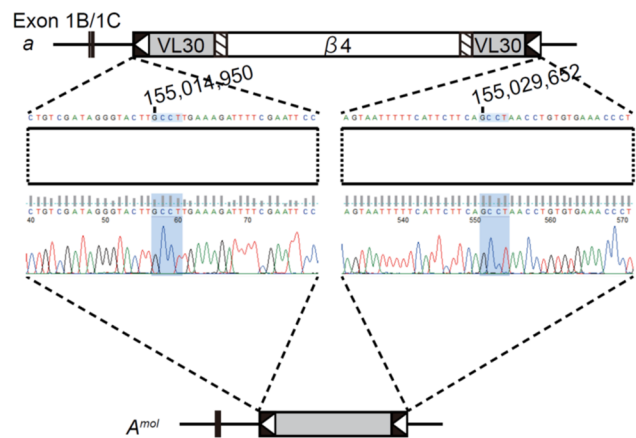

**Supplementary Figure 8 | Sequencing of the VL30 in the *agouti* loci of wild-derived strains.** Representative electropherograms from Sanger sequencing of the region spanning the sites of the β4 (left) and VL30 (right) insertions in the MSM (*A<sup>mol</sup>/A<sup>mol</sup>*) strain.



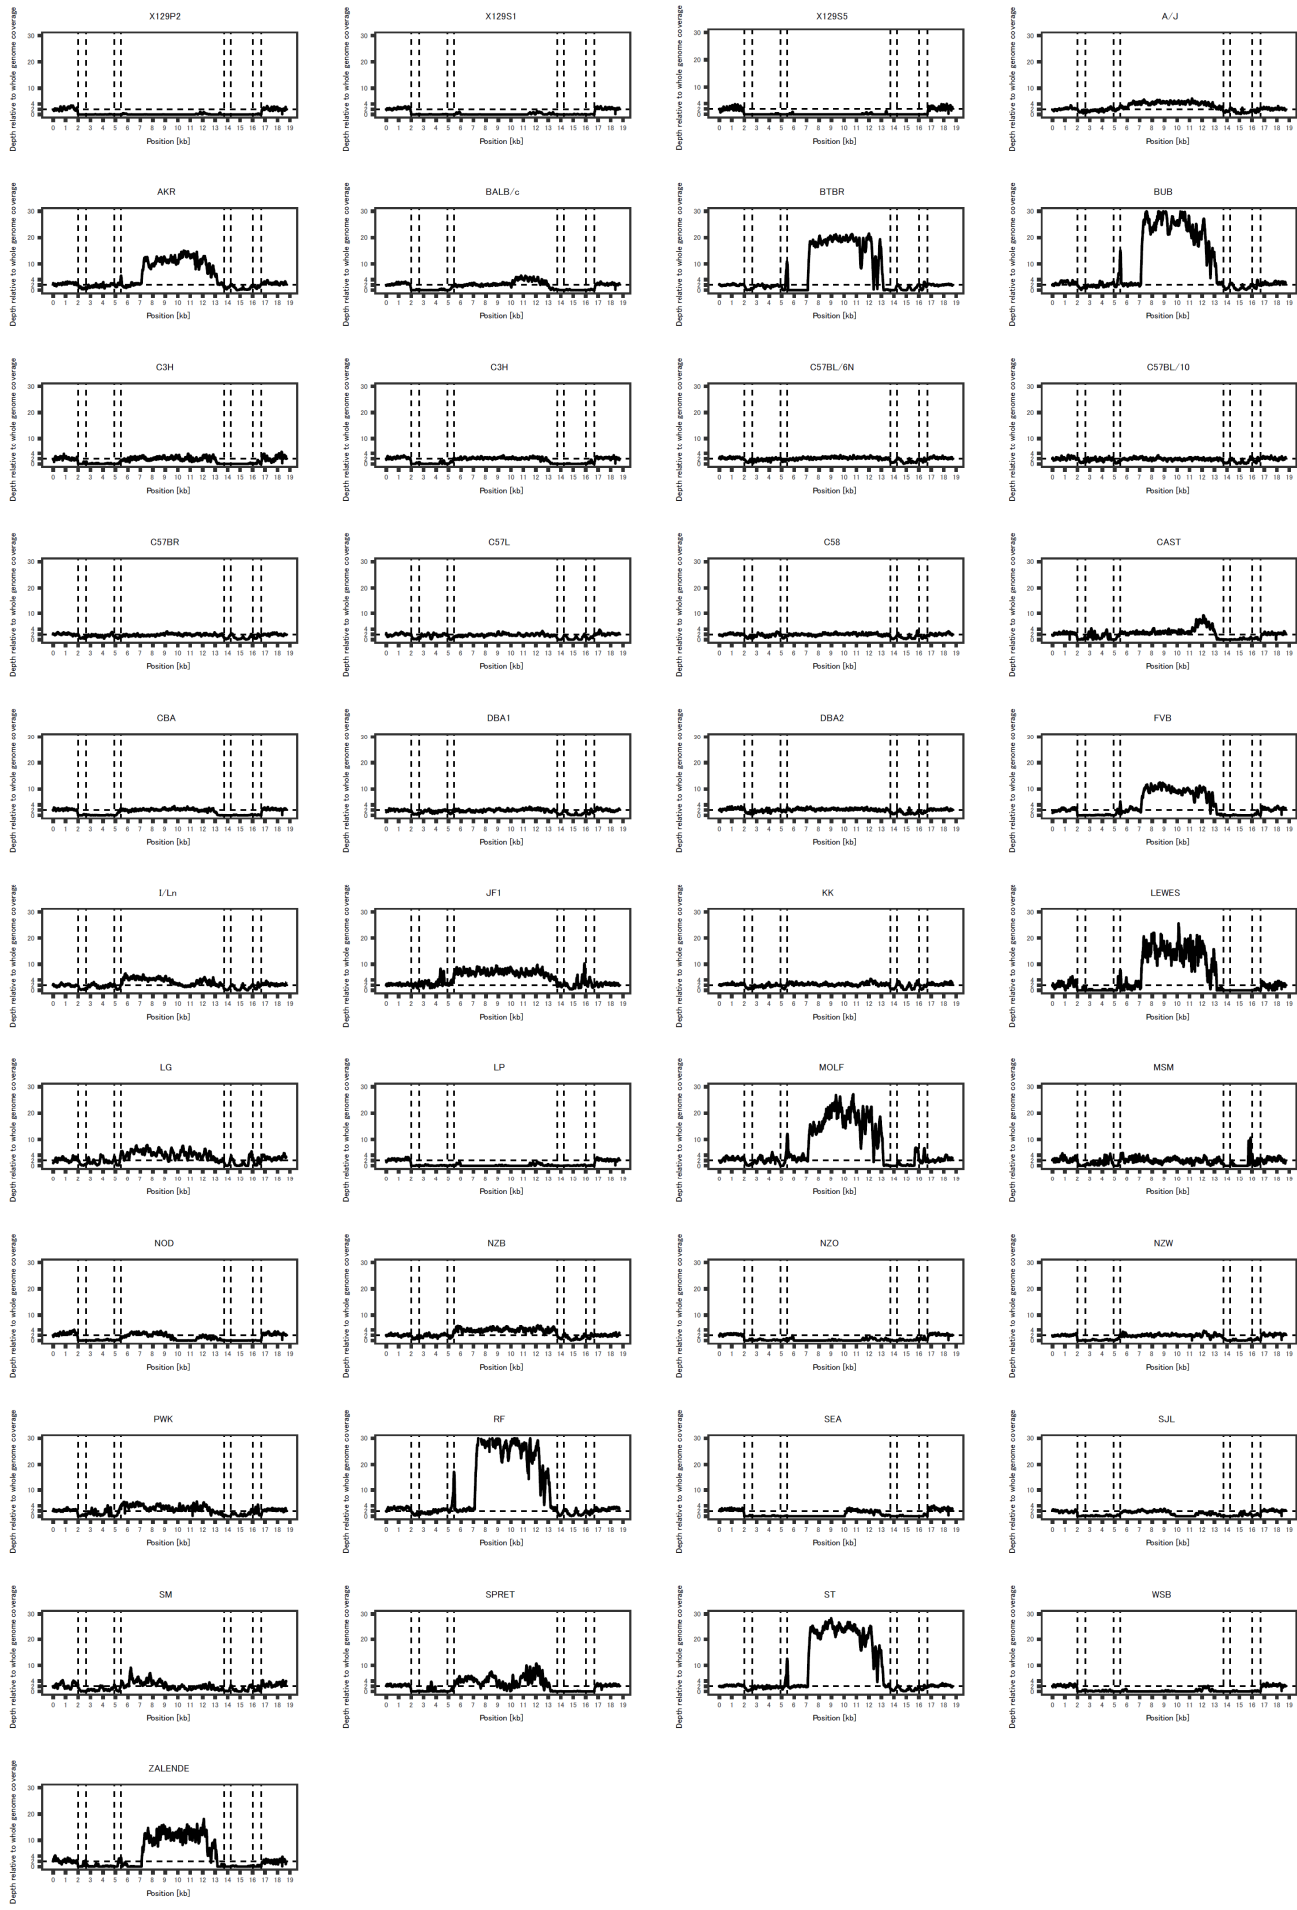

**Supplementary Figure 9 | Depth of NGS reads across the  $\beta$ 4 and the VL30 insertions in *agouti* loci in various inbred strains.** For each strain, we determined the sequencing depth across the  $\beta$ 4 and the VL30 insertions and adjacent 2 kb of flanking sequences (chr2:155,012,951–155,031,651) relative to the coverage of the whole genome. The relative values were multiplied by 2 to determine copy number. The horizontal dashed line indicates a depth of 2. The vertical dashed lines indicate the positions of both sides of the 5' and 3' LTRs of the  $\beta$ 4 and the VL30. The depths of the LTR regions are underestimated because of low mapping quality. kb, kilobases.

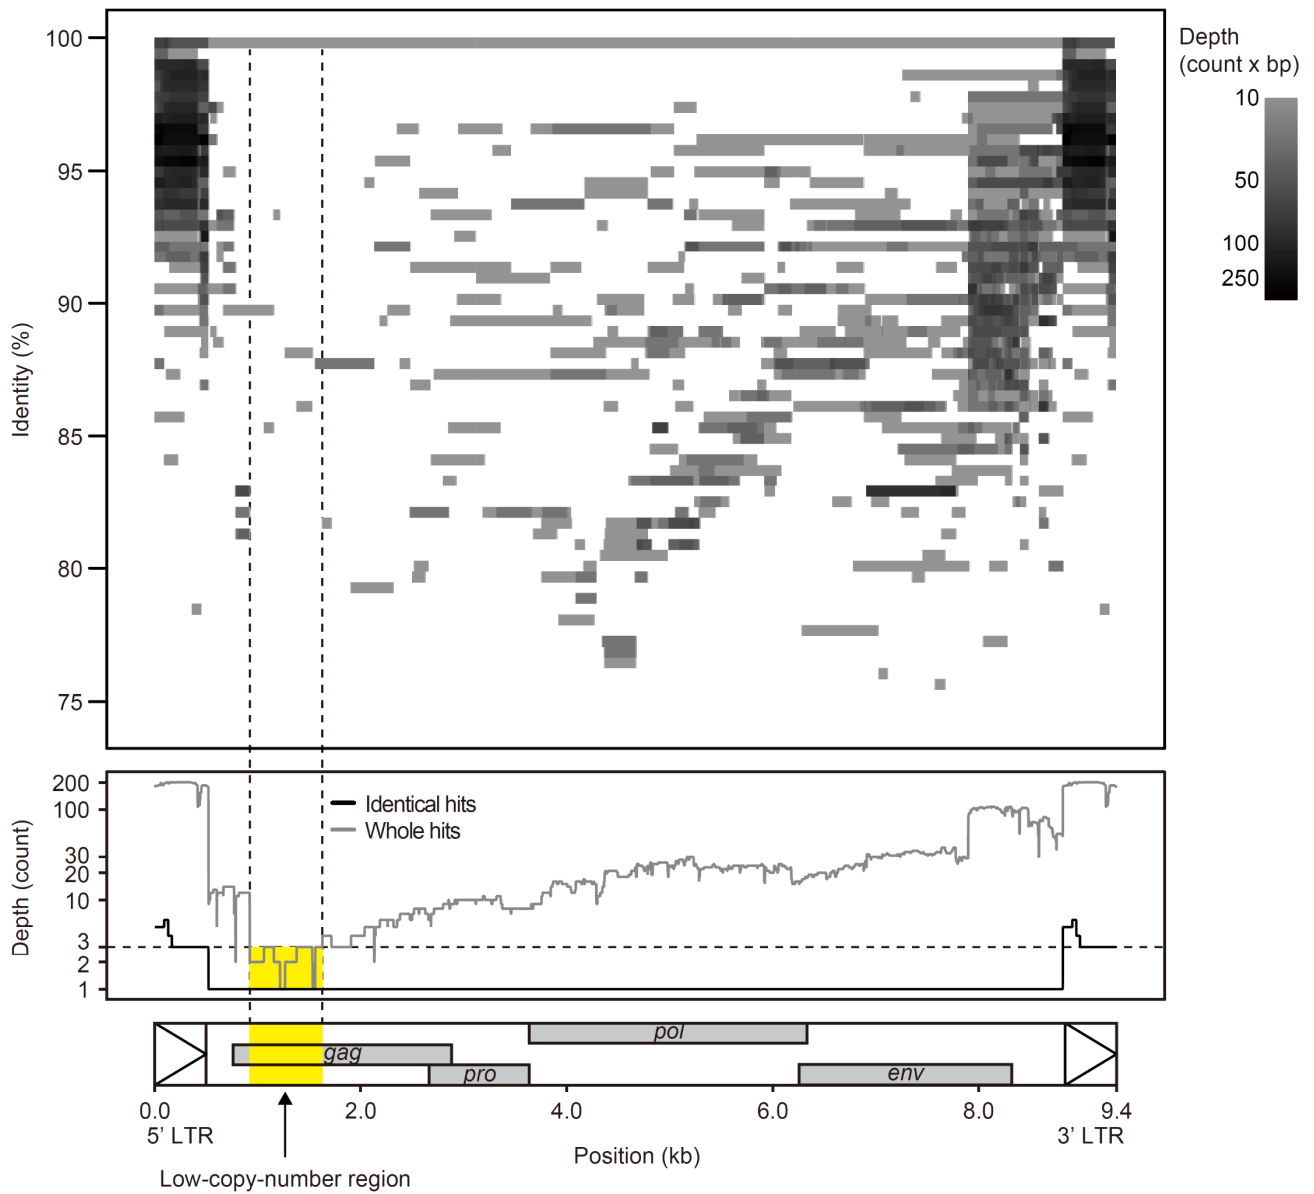

**Supplementary Figure 10 | Recruitment plot of homologous sequences of  $\beta 4$  in the *a* allele.** BLAST hits with  $>70\%$  identity aligned against the  $\beta 4$  in the *a* allele. The *x*-axis shows the hit position along the sequence, and the *y*-axis indicates the percent identity of the hit, ranging from 75 to 100 % (upper panel), and the depth of each hit (lower panel). Whole hits (gray line) and hits with 100 % sequence identity (black line) are indicated. Schematic representation of structure of  $\beta 4$  in the *a* allele is indicated on the bottom with its low copy-number region (yellow). LTR, long terminal repeat. kb, kilobases. bp, base pair.

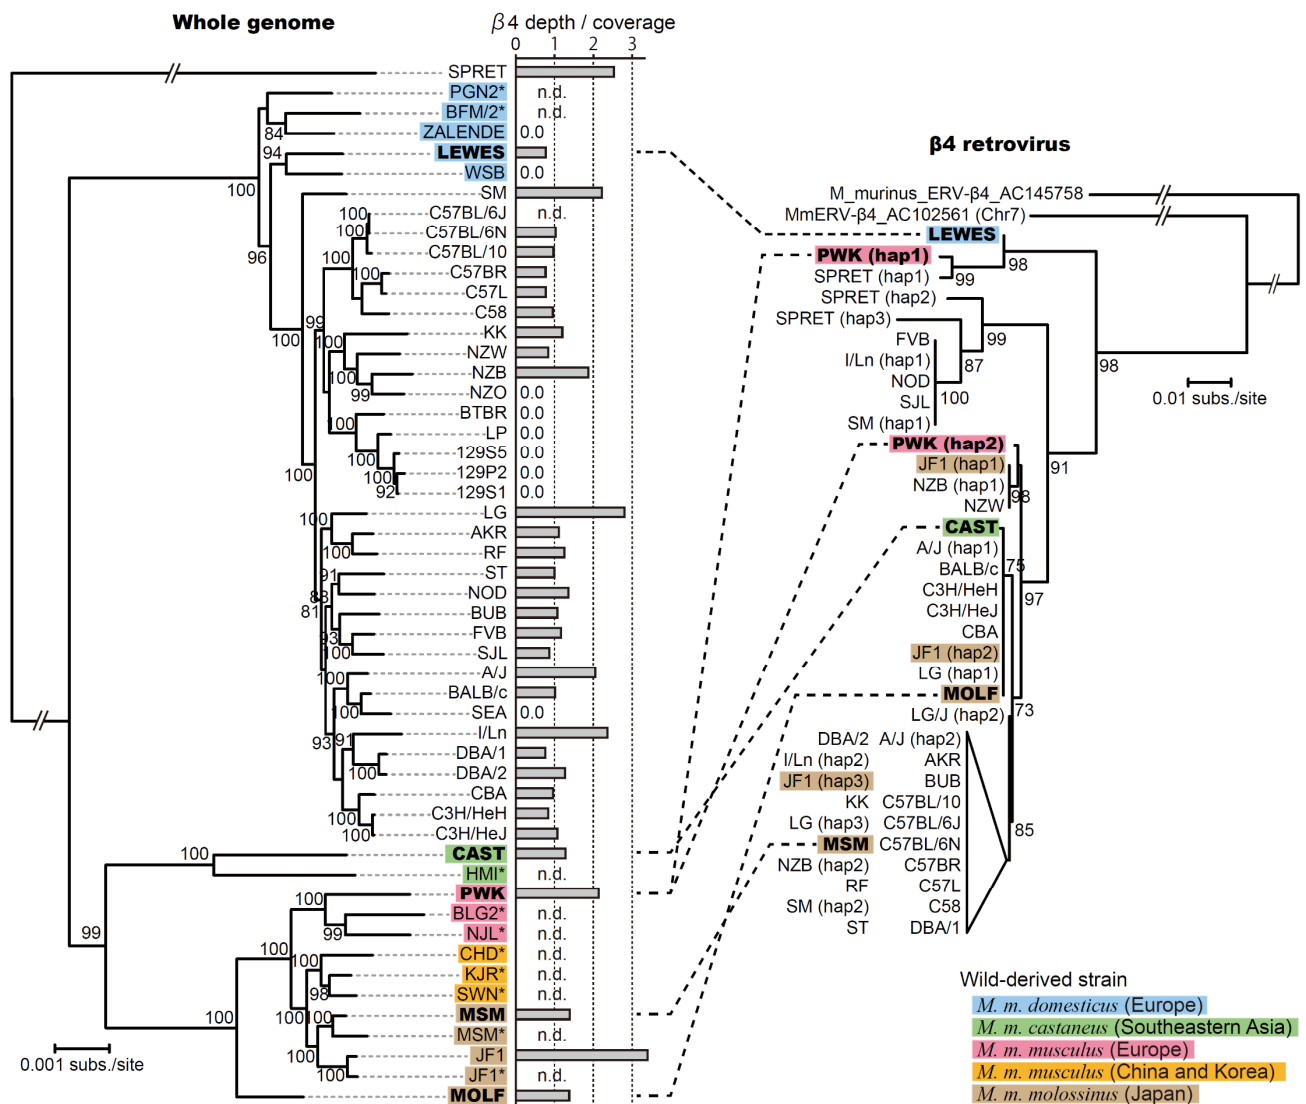

**Supplementary Figure 11 | Tanglegram of the host and  $\beta 4$  retrovirus.** Maximum likelihood neighbor-joining trees based on alignments of the sequence of all autosomal chromosomes (left) and the haplotypes of the  $\beta 4$  sequence (right). Wild-derived strains (bold letters) are connected with dashed lines between the phylogenetic trees. Left: The *M. spretus*-derived SPRET/EiJ (SPRET) was used as an outgroup. Right: a gray mouse lemur (*Microcebus murinus*) endogenous retrovirus (M\_murinus\_ERV- $\beta 4$ \_AC145758) and the reference  $\beta 4$  retrovirus (MmERV- $\beta 4$ \_AC102561) were used as an outgroup. Middle: the copy numbers of  $\beta 4$  are shown as the average depth in the low copy-number region of  $\beta 4$  divided by the whole-genome coverage. The description is according to Fig. 5a. Scale bar = 0.001 (left) and 0.01 (right) nucleotide substitutions per site. n.d., no data available.

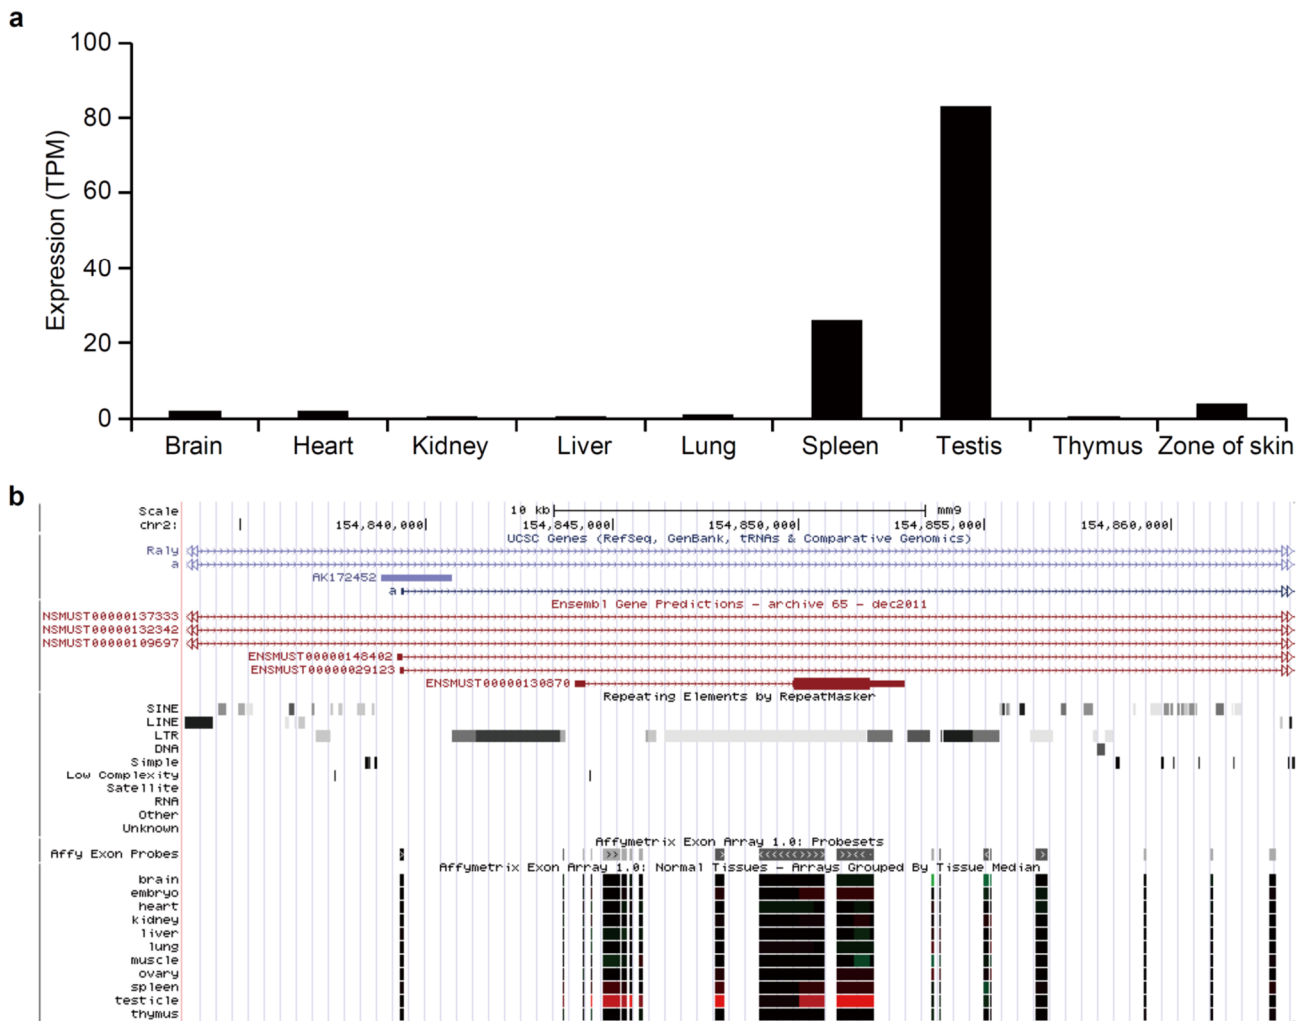

**Supplementary Figure 12 | Tissue-specific expression of  $\beta 4$  endogenous retrovirus in the *a* allele. **a**, RNA-seq data (GSE74747)<sup>3</sup> of the *Gm14226* gene (ENSMUSG00000084897 - Ensembl 91) in nine tissues from an adult male B6 mouse. Data were obtained from Expression Atlas. **b**, Microarray data<sup>4</sup> of the *Gm14226* gene (ENSMUST00000130870 - Ensembl 65) in 11 tissues from Affymetrix Mouse Exon 1.0 ST arrays. Screenshot of UCSC Genome Browser was captured using NCBI37/mm9 assembly.**

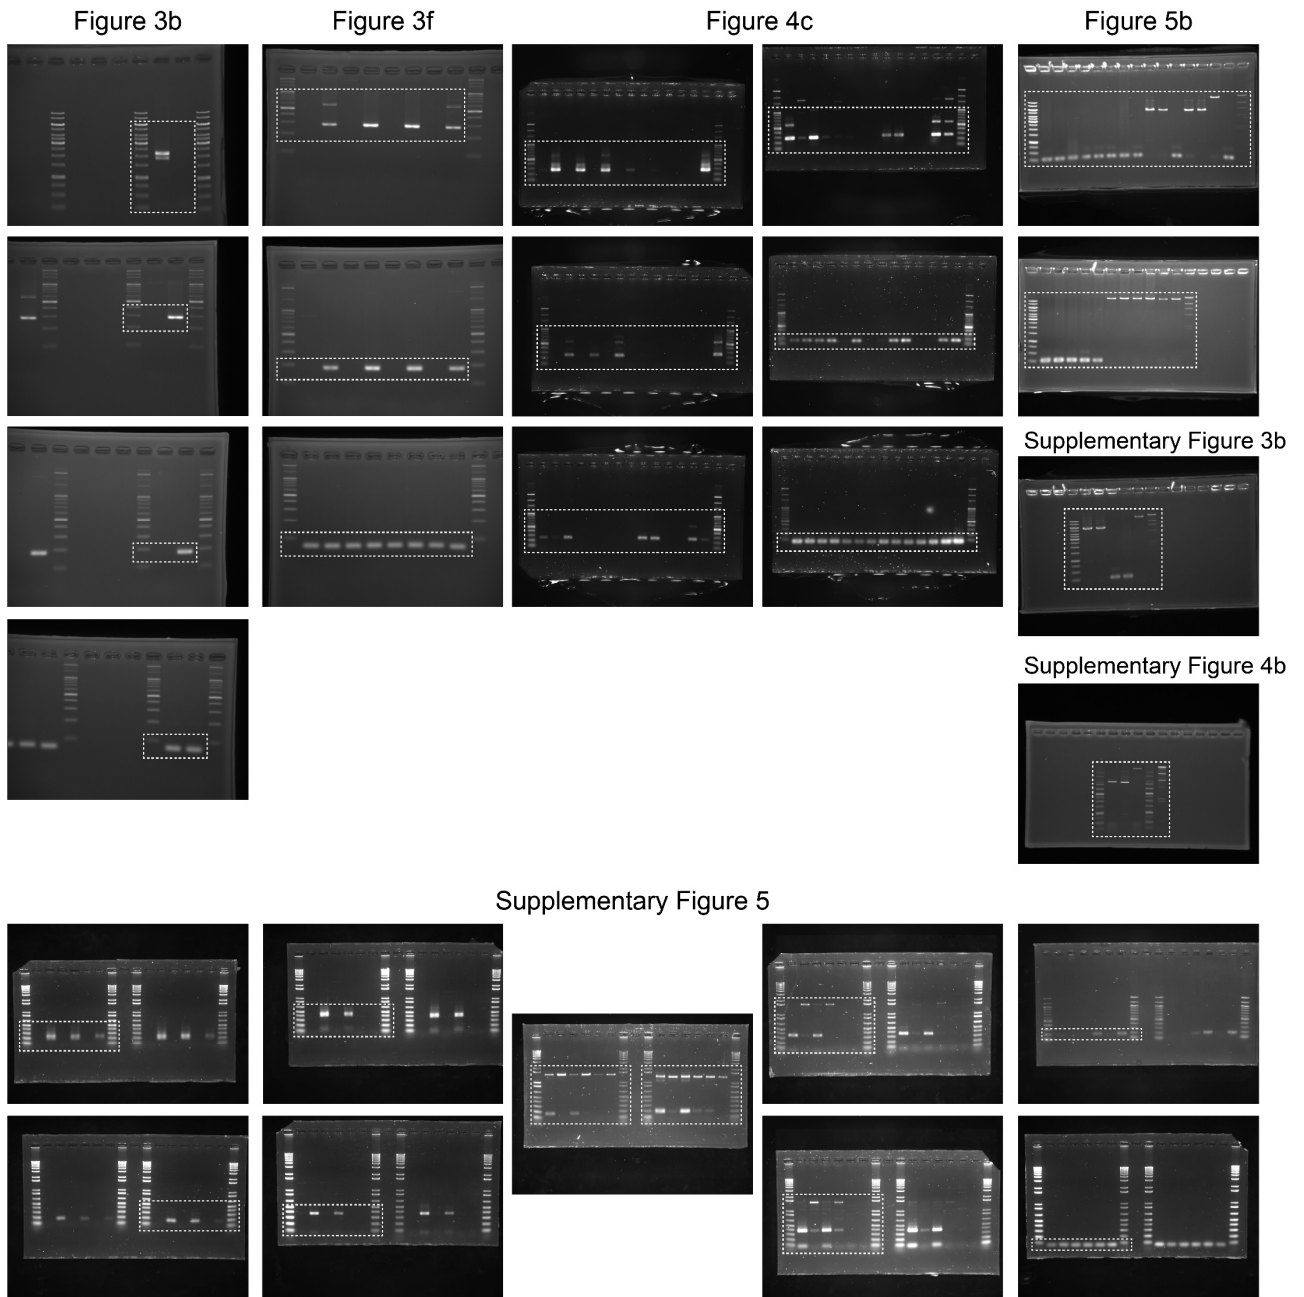

**Supplementary Figure 13 | Original uncropped images of agarose gels.** White broken boxes indicate the borders of the cropped images presented in the manuscript.

**Supplementary Table 1 | Summary of primer and oligonucleotide sequences.**

| Name                        | Sequence                                                                              | Length<br>[nt] | Chr. | Strand | Start       | End         | Experiment                 |
|-----------------------------|---------------------------------------------------------------------------------------|----------------|------|--------|-------------|-------------|----------------------------|
| Agouti-exon1A F2            | TCAGAAGAGGGAGTCATCAGC                                                                 | 21             | 2    | +      | 154,951,250 | 154,951,270 | RT-PCR                     |
| Agouti-exon1Ad F1           | CGATTTCTGATGAATCCTGGAAC                                                               | 23             | 2    | +      | 154,952,550 | 154,952,572 | RT-PCR                     |
| Agouti-exon1B F1            | CTGGGACGAGTCTGAACCTAC                                                                 | 21             | 2    | +      | 155,013,452 | 155,013,472 | RT-PCR                     |
| Agouti-exon1C F1            | AGACATTCTGGCCTGGCTTC                                                                  | 20             | 2    | +      | 155,013,584 | 155,013,603 | RT-PCR                     |
| Agouti-exon2 F1             | GGCTTCCTGTGCTTCTTCAC                                                                  | 20             | 2    | +      | 155,045,658 | 155,045,677 | RT-PCR                     |
| Agouti-exon3 R2             | GAAGACCTCTCCGCTTCTC                                                                   | 20             | 2    | -      | 155,047,717 | 155,047,736 | RT-PCR                     |
| VL30 LTR R1                 | GGAACAGCCTCTCTCAATTCC                                                                 | 21             | 2    | -      | 155,014,903 | 155,014,923 | RT-PCR                     |
| MmERV-B4 LTR 6R             | GTTATTTCGTGGGTGCGAG                                                                   | 18             | 2    | -      | 155,018,347 | 155,018,364 | RT-PCR                     |
| ERVb4-1_env 1R              | TCTTCTTTGAGGGCTGCACATA                                                                | 22             | 2    | -      | 155,025,746 | 155,025,767 | RT-PCR                     |
| βactin F                    | TGACAGGATGCAGAAGGAGA                                                                  | 20             | 5    | -      | 142,904,102 | 142,904,121 | RT-PCR                     |
| βactin R                    | CGCTCAGGAGGAGCAATG                                                                    | 18             | 5    | +      | 142,903,922 | 142,903,939 | RT-PCR                     |
| T7-ERVb4R-opti-gRNA 1F      | GGATCCTAATACGACTCACTATAGGGGTGAGTCTTATCCCGTCCCGGTTTAAGAGCTATGCTGG                      | 64             | N/A  | N/A    | N/A         | N/A         | CRISPR                     |
| T7-ERVb4L-opti-gRNA 1F      | GGATCCTAATACGACTCACTATAGGGTCTCTGACAGAGTCTGTCCGTTTAAGAGCTATGCTGG                       | 64             | N/A  | N/A    | N/A         | N/A         | CRISPR                     |
| T7-VL30-opti-gRNA1          | GGATCCTAATACGACTCACTATAGGGGTCCACAGCTCTGTCGATAGTTTAAGAGCTATGCTGG                       | 64             | N/A  | N/A    | N/A         | N/A         | CRISPR                     |
| T7-VL30-opti-gRNA2          | GGATCCTAATACGACTCACTATAGGGTCAAACCCAGGGTTTCACACGTTTAAGAGCTATGCTGG                      | 64             | N/A  | N/A    | N/A         | N/A         | CRISPR                     |
| T7-gRNA-PCR-R               | AAAAAAGCACCGACTCGGTGCC                                                                | 22             | N/A  | N/A    | N/A         | N/A         | CRISPR                     |
| Null-ERVb4-37bp-AGACTC-37bp | CAAGTGGGCGGATGCCTCCCTCACTGGAACCTTGGAACAGACTCACTGCCAGCAACTCAGGGTGG<br>TGCCACCTTCTGAGAA | 80             | 2    | +      | 155,017,821 | 155,027,244 | CRISPR                     |
| VL30-del oligo              | GAGAGAGGCTGTTCCACAGCTCTGTCGATATCATACTTGCCTAATGCGTGTGAAACCTGGGTTT<br>GATTCCCCAGCATCA   | 80             | 2    | +      | 155,014,909 | 155,029,693 | CRISPR                     |
| Agouti-VL30 5F              | CCAAGTGAAAGGAATTGAGAGGCTGTTCCACAGCTCTG                                                | 38             | 2    | +      | 155,014,893 | 155,014,932 | Genomic PCR,<br>Sequencing |
| Agouti-VL30 4R              | TTGGGAATCACAAGCATAACCTCATATCCGGTTGG                                                   | 36             | 2    | -      | 155,029,833 | 155,029,868 | Genomic PCR,<br>Sequencing |
| MMVL30-ins.check F1         | CTTTCTGTACCTTGGTCAGATTGTTG                                                            | 27             | 2    | +      | 155,017,707 | 155,017,733 | Sequencing                 |
| MMVL30-ins.check R1         | TTTCACTTAAGATAAGTGCCGGTTG                                                             | 26             | 2    | -      | 155,027,301 | 155,027,326 | Sequencing                 |

**Supplementary Table 2 | Summary of inbred strains.**

| Strain name                                       | Species             | Subspecies        | Type of lab strain | Strain origin (country) | Strain origin (province/state) | Strain origin (city) | Source Name (institution) | NGS data (institution) |
|---------------------------------------------------|---------------------|-------------------|--------------------|-------------------------|--------------------------------|----------------------|---------------------------|------------------------|
| 129P2/OlaHsd                                      | <i>Mus musculus</i> | na                | Classical          | Castle                  | na                             | na                   | JAX                       | Sanger                 |
| 129S1/SvlmJ                                       | <i>Mus musculus</i> | na                | Classical          | Castle                  | na                             | na                   | JAX                       | Sanger                 |
| 129S5/SvEvBrd                                     | <i>Mus musculus</i> | na                | Classical          | Castle                  | na                             | na                   | JAX                       | Sanger                 |
| A/J                                               | <i>Mus musculus</i> | na                | Classical          | Castle                  | na                             | na                   | JAX                       | Sanger                 |
| AKR/J                                             | <i>Mus musculus</i> | na                | Classical          | Castle                  | na                             | na                   | JAX                       | Sanger                 |
| Balb/cJ                                           | <i>Mus musculus</i> | na                | Classical          | Castle                  | na                             | na                   | JAX                       | Sanger                 |
| BFM/2Ms                                           | <i>Mus musculus</i> | <i>domesticus</i> | Wild-derived       | France                  | Montpellier                    | na                   | NIG                       | NIG                    |
| BLG2/Ms                                           | <i>Mus musculus</i> | <i>musculus</i>   | Wild-derived       | Bulgaria                | Toshevo                        | na                   | NIG                       | NIG                    |
| BTBR T <sup>+</sup><br><i>Ipr3<sup>fl</sup>/J</i> | <i>Mus musculus</i> | na                | Classical          | Unknown                 | na                             | na                   | JAX                       | Sanger                 |
| BUB/BnJ                                           | <i>Mus musculus</i> | na                | Classical          | Other inbred strains    | na                             | na                   | JAX                       | Sanger                 |
| C3H/HeH                                           | <i>Mus musculus</i> | na                | Classical          | Castle                  | na                             | na                   | JAX                       | Sanger                 |
| C3H/HeJ                                           | <i>Mus musculus</i> | na                | Classical          | Castle                  | na                             | na                   | JAX                       | Sanger                 |
| C57BL/10J                                         | <i>Mus musculus</i> | na                | Classical          | C57-related             | na                             | na                   | JAX                       | Sanger                 |
| C57BL/6NJ                                         | <i>Mus musculus</i> | na                | Classical          | C57-related             | na                             | na                   | JAX                       | Sanger                 |
| C57BR/cdJ                                         | <i>Mus musculus</i> | na                | Classical          | C57-related             | na                             | na                   | JAX                       | Sanger                 |
| C57L/J                                            | <i>Mus musculus</i> | na                | Classical          | C57-related             | na                             | na                   | JAX                       | Sanger                 |
| C58/J                                             | <i>Mus musculus</i> | na                | Classical          | C57-related             | na                             | na                   | JAX                       | Sanger                 |
| CAST/EiJ                                          | <i>Mus musculus</i> | <i>castaneus</i>  | Wild-derived       | Thailand                | na                             | Thonburi             | JAX                       | Sanger                 |
| CBA/J                                             | <i>Mus musculus</i> | na                | Classical          | Castle                  | na                             | na                   | JAX                       | Sanger                 |
| CHD/Ms                                            | <i>Mus musculus</i> | <i>musculus</i>   | Wild-derived       | China                   | Chengdu                        | na                   | NIG                       | NIG                    |
| DBA/1J                                            | <i>Mus musculus</i> | na                | Classical          | Castle                  | na                             | na                   | JAX                       | Sanger                 |
| DBA/2J                                            | <i>Mus musculus</i> | na                | Classical          | Castle                  | na                             | na                   | JAX                       | Sanger                 |
| FVB/NJ                                            | <i>Mus musculus</i> | na                | Classical          | Swiss                   | na                             | na                   | JAX                       | Sanger                 |
| HMI/Ms                                            | <i>Mus musculus</i> | <i>castaneus</i>  | Wild-derived       | Taiwan                  | Hemei                          | na                   | NIG                       | NIG                    |
| I/LnJ                                             | <i>Mus musculus</i> | na                | Classical          | Castle                  | na                             | na                   | JAX                       | Sanger                 |
| JF1/Ms                                            | <i>Mus musculus</i> | <i>molossinus</i> | Fancy mice         | Japan                   | na                             | Denmark Market       | NIG                       | Sanger                 |
| KJR/Ms                                            | <i>Mus musculus</i> | <i>musculus</i>   | Wild-derived       | Korea                   | Kojuri                         | na                   | NIG                       | NIG                    |
| KK/HIJ                                            | <i>Mus musculus</i> | na                | Classical          | China & Japan           | na                             | na                   | JAX                       | Sanger                 |
| LEWES/EiJ                                         | <i>Mus musculus</i> | <i>domesticus</i> | Wild-derived       | US                      | Delaware                       | na                   | JAX                       | Sanger                 |
| LG/J                                              | <i>Mus musculus</i> | na                | Classical          | Other inbred strains    | na                             | na                   | JAX                       | Sanger                 |
| LP/J                                              | <i>Mus musculus</i> | na                | Classical          | Castle                  | na                             | na                   | JAX                       | Sanger                 |
| MOLF/EiJ                                          | <i>Mus musculus</i> | <i>molossinus</i> | Wild-derived       | Japan                   | Kyushu                         | Fukuoka              | JAX                       | Sanger                 |
| MSM/Ms                                            | <i>Mus musculus</i> | <i>molossinus</i> | Wild-derived       | Japan                   | Shizuoka                       | Mishima              | NIG                       | NIG                    |
| NJL/Ms                                            | <i>Mus musculus</i> | <i>musculus</i>   | Wild-derived       | Denmark                 | Northern Jutland               | na                   | NIG                       | NIG                    |
| NOD/LtJ                                           | <i>Mus musculus</i> | na                | Classical          | Swiss                   | na                             | na                   | JAX                       | Sanger                 |
| NZB/BINJ                                          | <i>Mus musculus</i> | na                | Classical          | Castle                  | na                             | na                   | JAX                       | Sanger                 |
| NZO/HILtJ                                         | <i>Mus musculus</i> | na                | Classical          | Castle                  | na                             | na                   | JAX                       | Sanger                 |
| NZW/LacJ                                          | <i>Mus musculus</i> | na                | Classical          | Castle                  | na                             | na                   | JAX                       | Sanger                 |
| P/J                                               | <i>Mus musculus</i> | na                | Classical          | Castle                  | na                             | na                   | JAX                       | Sanger                 |
| PGN2/Ms                                           | <i>Mus musculus</i> | <i>domesticus</i> | Wild-derived       | Canada                  | Ontario                        | Windsor              | NIG                       | NIG                    |
| PWK/PhJ                                           | <i>Mus musculus</i> | <i>musculus</i>   | Wild-derived       | Czech Rep               | Bohemia                        | Lhotka               | JAX                       | Sanger                 |
| RF/J                                              | <i>Mus musculus</i> | na                | Classical          | Castle                  | na                             | na                   | JAX                       | Sanger                 |
| SEA/GnJ                                           | <i>Mus musculus</i> | na                | Classical          | Castle                  | na                             | na                   | JAX                       | Sanger                 |
| SEG/Pas                                           | <i>Mus spretus</i>  | na                | Wild-derived       | Spain                   | Granada                        | na                   | PAS                       | na                     |
| SJL/J                                             | <i>Mus musculus</i> | na                | Classical          | Swiss                   | na                             | na                   | JAX                       | Sanger                 |
| SM/J                                              | <i>Mus musculus</i> | na                | Classical          | Castle                  | na                             | na                   | JAX                       | Sanger                 |
| SPRET/EiJ                                         | <i>Mus spretus</i>  | na                | Wild-derived       | Spain                   | Cadiz Province                 | Puerto Real          | JAX                       | Sanger                 |
| ST/bJ                                             | <i>Mus musculus</i> | na                | Classical          | Other inbred strains    | na                             | na                   | JAX                       | Sanger                 |
| SWN/Ms                                            | <i>Mus musculus</i> | <i>musculus</i>   | Wild-derived       | Korea                   | Suweon                         | na                   | NIG                       | NIG                    |
| WSB/EiJ                                           | <i>Mus musculus</i> | <i>domesticus</i> | Wild-derived       | US                      | Maryland                       | Centerville          | JAX                       | Sanger                 |
| ZALENDE/EiJ                                       | <i>Mus musculus</i> | <i>domesticus</i> | Wild-derived       | Switzerland             | na                             | Zalende              | JAX                       | Sanger                 |



**Supplementary Table 3 | Genome coverage and depth and estimated copy numbers of the  $\beta 4$  sequence among inbred strains.**

| Sample                                        | Total_Depth | LCN_Depth | LCN_Depth (hard filtered) | Internal_Depth | LCN_Depth/Total_Depth | LCN_Depth(hard filtered)/Total_Depth |
|-----------------------------------------------|-------------|-----------|---------------------------|----------------|-----------------------|--------------------------------------|
| 129P2/OlaHsd                                  | 37.49       | 0.10      | 0.05                      | 1.37           | 0.00                  | 0.00                                 |
| 129S1/SvImJ                                   | 56.61       | 0.18      | 0.18                      | 4.20           | 0.00                  | 0.00                                 |
| 129S5/SvEvBrd                                 | 17.14       | 0.00      | 0.00                      | 0.48           | 0.00                  | 0.00                                 |
| A/J                                           | 48.27       | 99.94     | 98.95                     | 99.21          | 2.07                  | 2.04                                 |
| AKR/J                                         | 50.00       | 55.40     | 55.09                     | 213.91         | 1.10                  | 1.10                                 |
| BALB/cJ                                       | 53.93       | 55.52     | 54.82                     | 69.50          | 1.02                  | 1.01                                 |
| BTBR <i>T<sup>+</sup> Ipr3<sup>fl</sup>/J</i> | 78.12       | 0.00      | 0.00                      | 491.64         | 0.00                  | 0.00                                 |
| BUB/BnJ                                       | 42.03       | 45.63     | 45.04                     | 372.43         | 1.08                  | 1.07                                 |
| C3H/HeH                                       | 13.47       | 14.24     | 14.21                     | 13.00          | 1.05                  | 1.05                                 |
| C3H/HeJ                                       | 55.43       | 60.56     | 59.56                     | 55.68          | 1.09                  | 1.07                                 |
| C57BL/10J                                     | 25.50       | 27.28     | 26.97                     | 24.41          | 1.06                  | 1.05                                 |
| C57BL/6NJ                                     | 52.20       | 54.09     | 53.25                     | 59.05          | 1.03                  | 1.02                                 |
| C57BR/cdJ                                     | 39.86       | 32.71     | 31.95                     | 36.84          | 0.82                  | 0.80                                 |
| C57L/J                                        | 42.89       | 33.57     | 33.12                     | 38.99          | 0.78                  | 0.77                                 |
| C58/J                                         | 43.61       | 43.52     | 43.02                     | 44.15          | 0.99                  | 0.98                                 |
| CAST/EiJ                                      | 45.23       | 59.01     | 58.18                     | 74.14          | 1.30                  | 1.28                                 |
| CBA/J                                         | 49.37       | 48.14     | 47.41                     | 49.74          | 0.97                  | 0.96                                 |
| DBA/1J                                        | 38.13       | 30.67     | 30.14                     | 37.72          | 0.80                  | 0.79                                 |
| DBA/2J                                        | 47.27       | 60.51     | 59.69                     | 54.46          | 1.28                  | 1.26                                 |
| FVB/NJ                                        | 62.85       | 73.83     | 70.66                     | 223.62         | 1.17                  | 1.12                                 |
| I/LnJ                                         | 34.55       | 83.82     | 82.27                     | 61.33          | 2.42                  | 2.38                                 |
| JF1/MsJ                                       | 28.45       | 100.36    | 98.44                     | 97.96          | 3.52                  | 3.46                                 |
| KK/HiJ                                        | 47.69       | 58.32     | 57.95                     | 58.32          | 1.22                  | 1.21                                 |
| LEWES/EiJ                                     | 4.45        | 3.66      | 3.51                      | 24.03          | 0.82                  | 0.78                                 |
| LG/J                                          | 27.89       | 77.63     | 76.74                     | 61.34          | 2.78                  | 2.75                                 |
| LP/J                                          | 45.93       | 0.00      | 0.00                      | 4.28           | 0.00                  | 0.00                                 |
| MOLF/EiJ                                      | 25.16       | 35.03     | 34.45                     | 166.51         | 1.39                  | 1.36                                 |
| MSM/Ms                                        | 13.86       | 20.04     | 18.58                     | 15.22          | 1.44                  | 1.34                                 |
| NOD/ShiLtJ                                    | 49.19       | 67.51     | 66.51                     | 36.08          | 1.37                  | 1.35                                 |
| NZB/B1NJ                                      | 38.51       | 74.78     | 73.77                     | 79.22          | 1.94                  | 1.91                                 |
| NZO/HILtJ                                     | 59.11       | 0.01      | 0.01                      | 6.69           | 0.00                  | 0.00                                 |
| NZW/LacJ                                      | 55.17       | 47.16     | 46.59                     | 56.40          | 0.85                  | 0.84                                 |
| PWK/PhJ                                       | 44.46       | 95.68     | 94.31                     | 71.55          | 2.15                  | 2.12                                 |
| RF/J                                          | 45.42       | 57.63     | 57.20                     | 429.65         | 1.26                  | 1.25                                 |
| SEA/GnJ                                       | 42.12       | 0.00      | 0.00                      | 15.28          | 0.00                  | 0.00                                 |
| SJL/J                                         | 40.72       | 35.54     | 35.49                     | 24.47          | 0.87                  | 0.87                                 |
| SM/J                                          | 23.08       | 52.51     | 51.90                     | 27.81          | 2.27                  | 2.24                                 |
| SPRET/EiJ                                     | 58.26       | 144.54    | 138.11                    | 119.08         | 2.48                  | 2.37                                 |
| ST/bJ                                         | 68.09       | 69.69     | 68.52                     | 557.64         | 1.02                  | 1.00                                 |
| WSB/EiJ                                       | 43.10       | 0.18      | 0.18                      | 4.79           | 0.00                  | 0.00                                 |
| ZALENDE/EiJ                                   | 17.02       | 0.19      | 0.19                      | 70.39          | 0.01                  | 0.01                                 |

## Reference

1. Adams, D. J., Doran, A. G., Lilue, J. & Keane, T. M. The Mouse Genomes Project: a repository of inbred laboratory mouse strain genomes. *Mamm. Genome* **26**, 403-412 (2015).
2. Takada, T. et al. The ancestor of extant Japanese fancy mice contributed to the mosaic genomes of classical inbred strains. *Genome Res.* **23**, 1329-1338 (2013).
3. Huntley, M. A. et al. Complex regulation of ADAR-mediated RNA-editing across tissues. *BMC Genomics* **17**, 61 (2016).
4. Pohl, A. A. et al. Affy exon tissues: exon levels in normal tissues in human, mouse and rat. *Bioinformatics* **25**, 2442-2443 (2009).
